# Supplementary material
Source: PubMed Central journal article supplement (PMC4486643)
Supplement: NIHMS657115-supplement-Supplementary_data.pdf [file NIHMS657115-supplement-Supplementary_data.pdf]

# Supplementary Figure 1: QQ plot of GWAS for Survival in AD

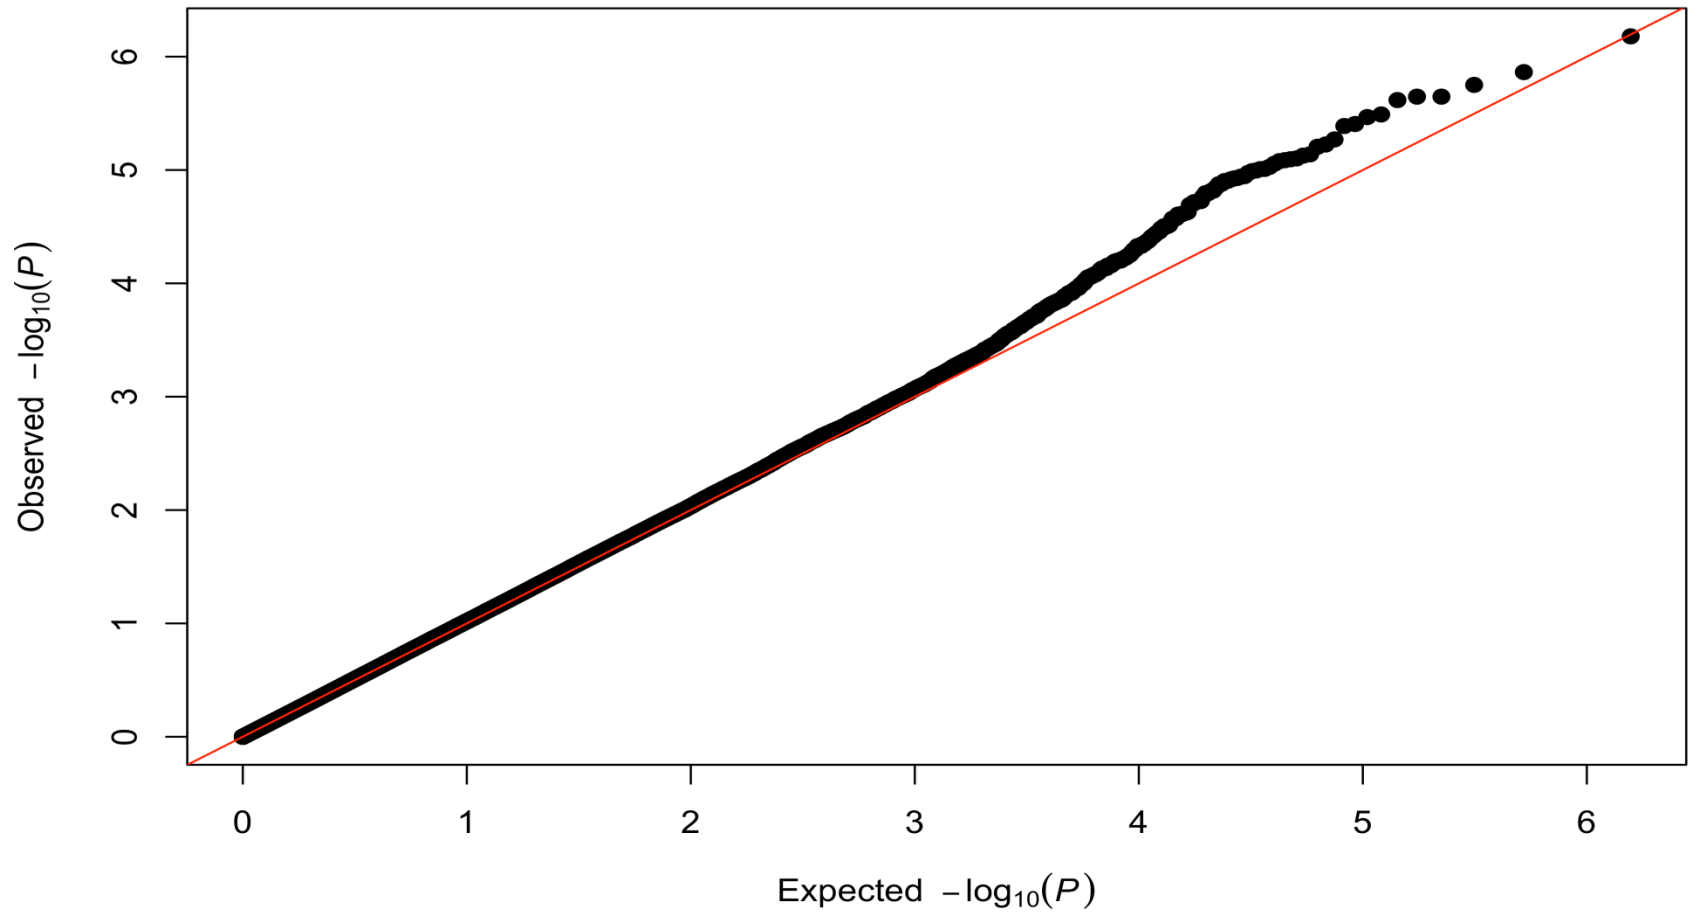

## Supplementary Figure 2: Manhattan plot of GWA SNP analysis

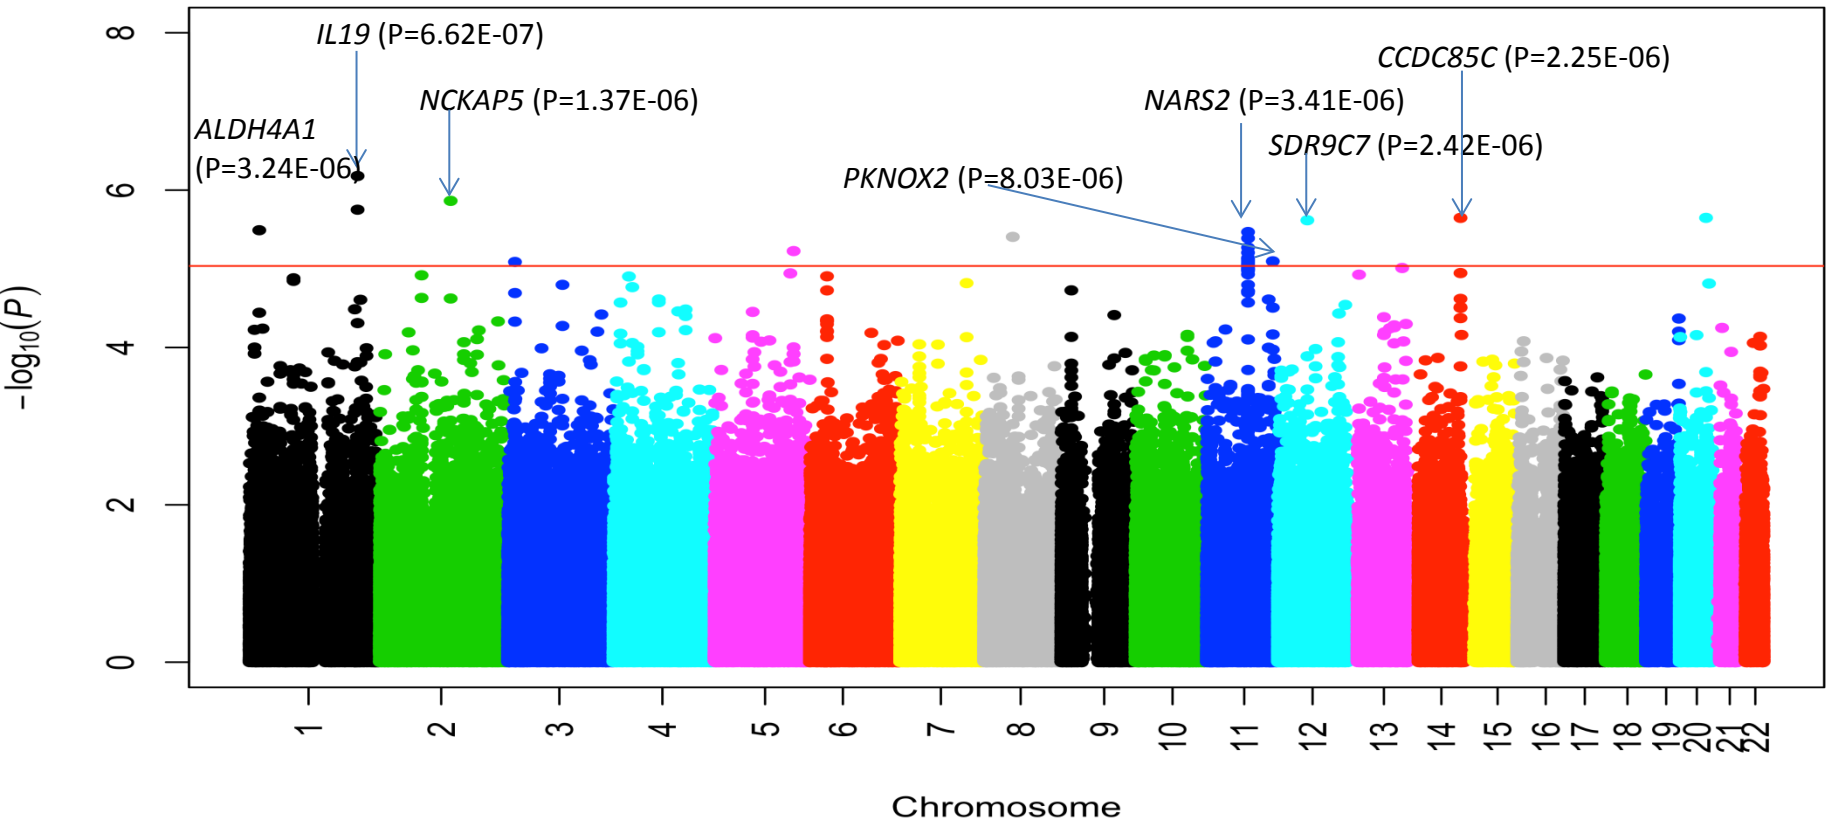

Note: The red line corresponds to the suggestive P-value threshold ( $P < 1.00E-05$ ).

# Supplementary Figure 3

Linkage disequilibrium structure of *IL19* gene. The top SNP is circled in red.

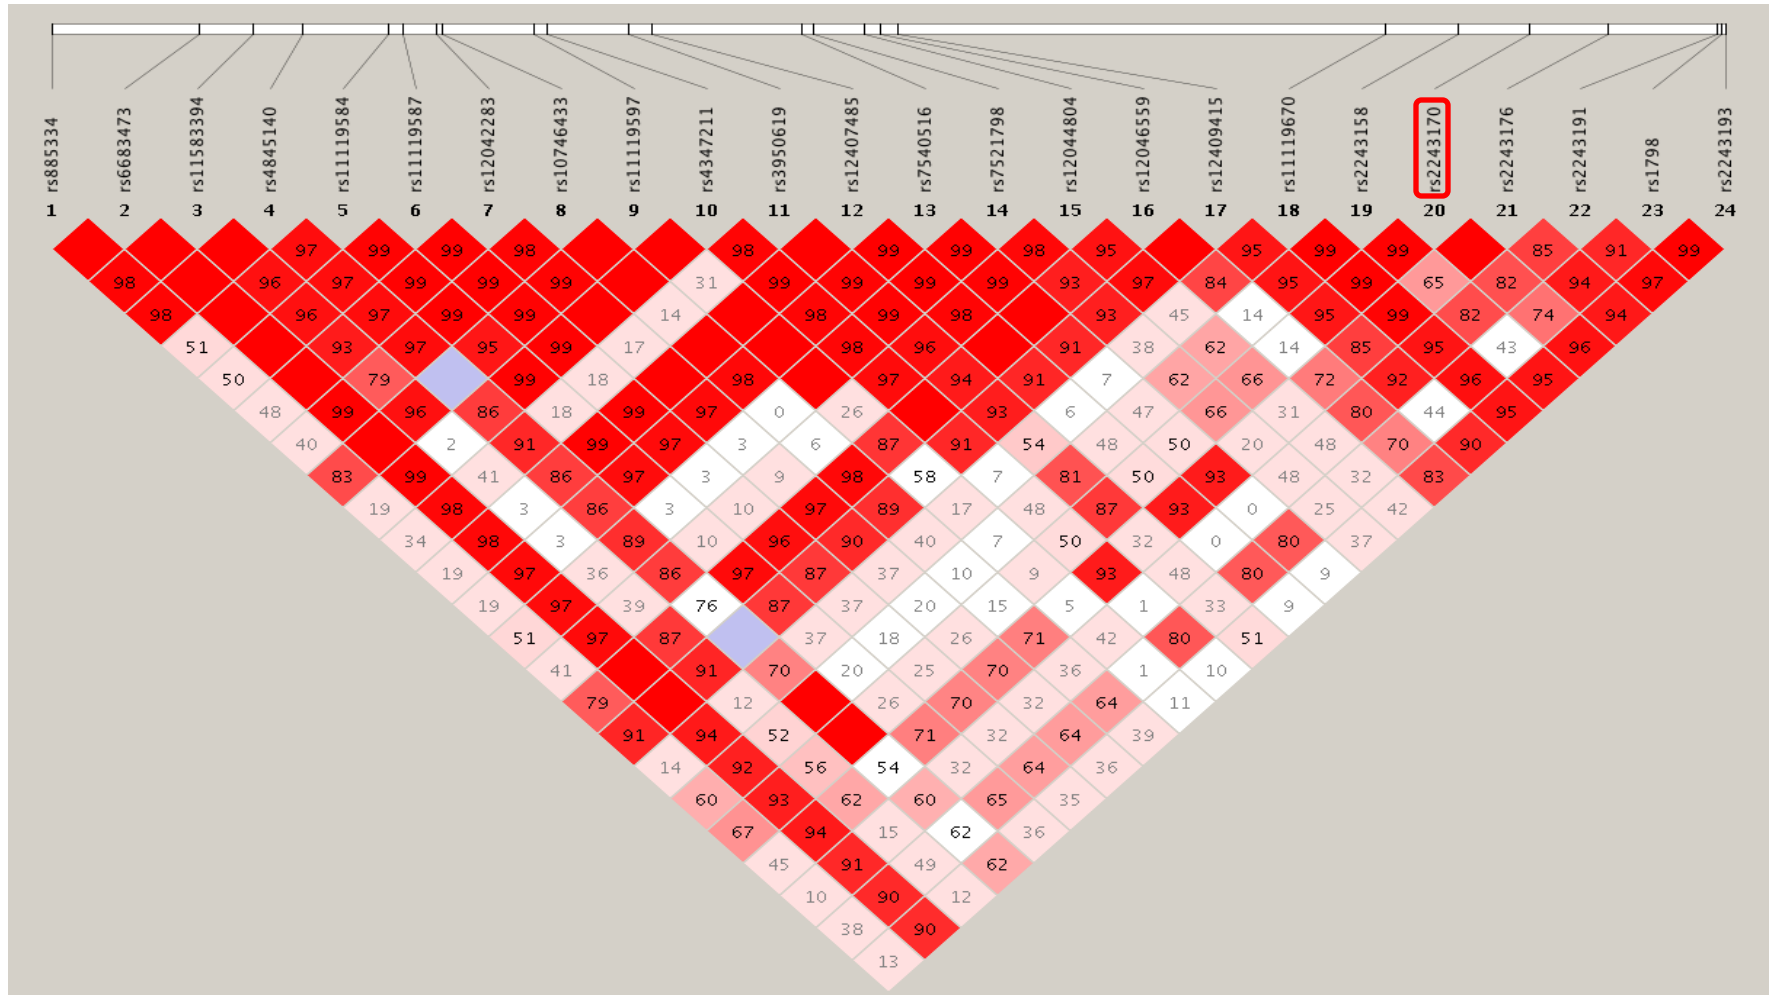

# Supplementary Figure 4: Regional plot for *IL19* (rs2243170)

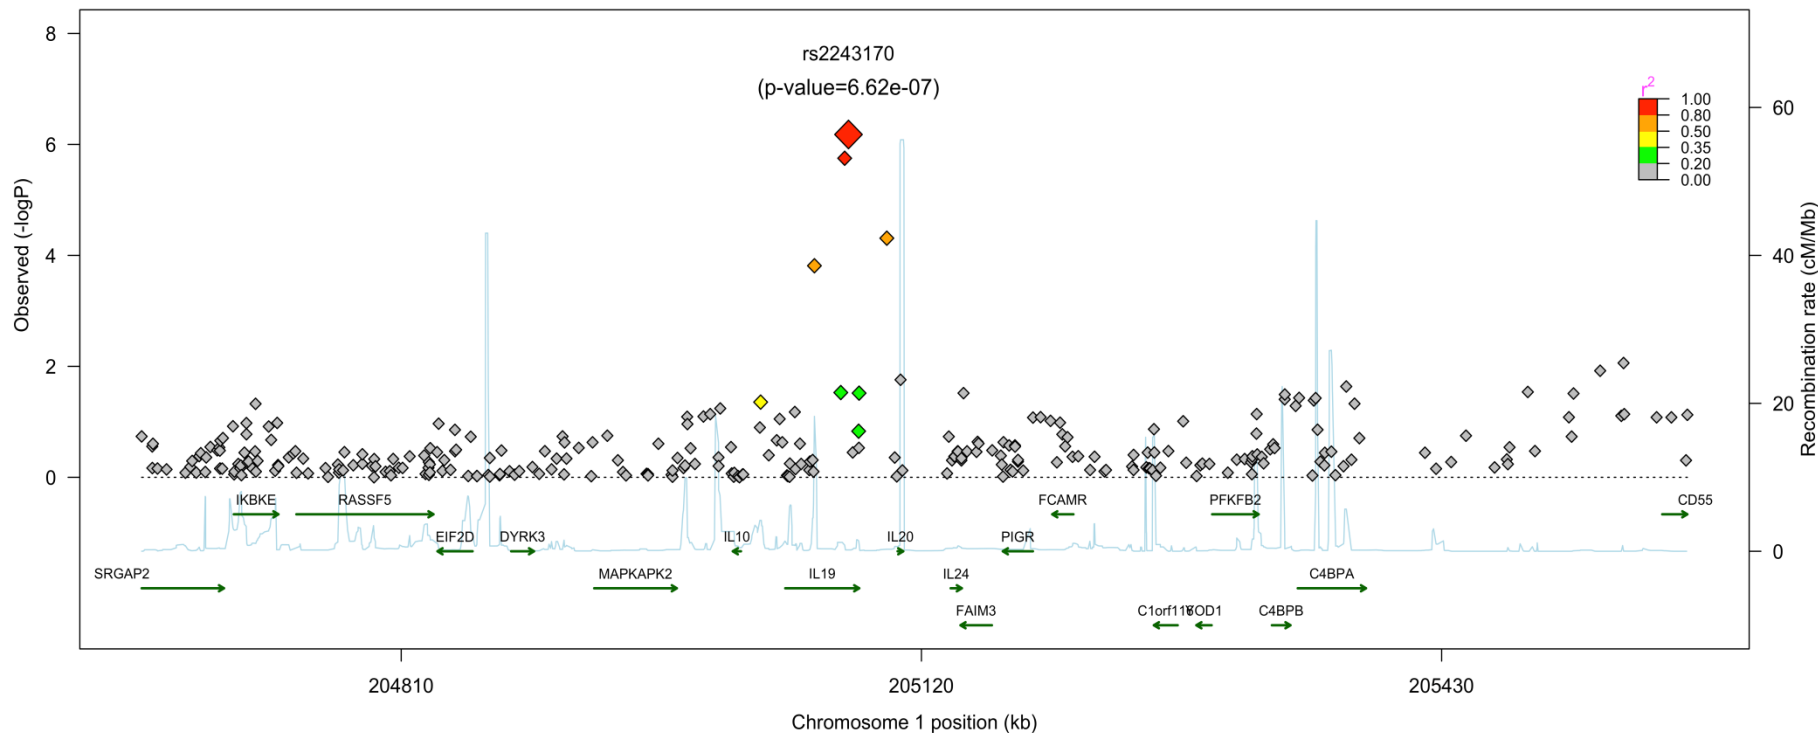

Note:  $r^2$  is a measure of LD between the top SNP and other SNPs. Red indicates a high LD, and gray indicates low LD. The blue curve in the plots shows the recombination rates. This is the same for Supplementary Figure 4 to 11.

# Supplementary Figure 5: Regional plot for *NCKAP5* (rs7588354)

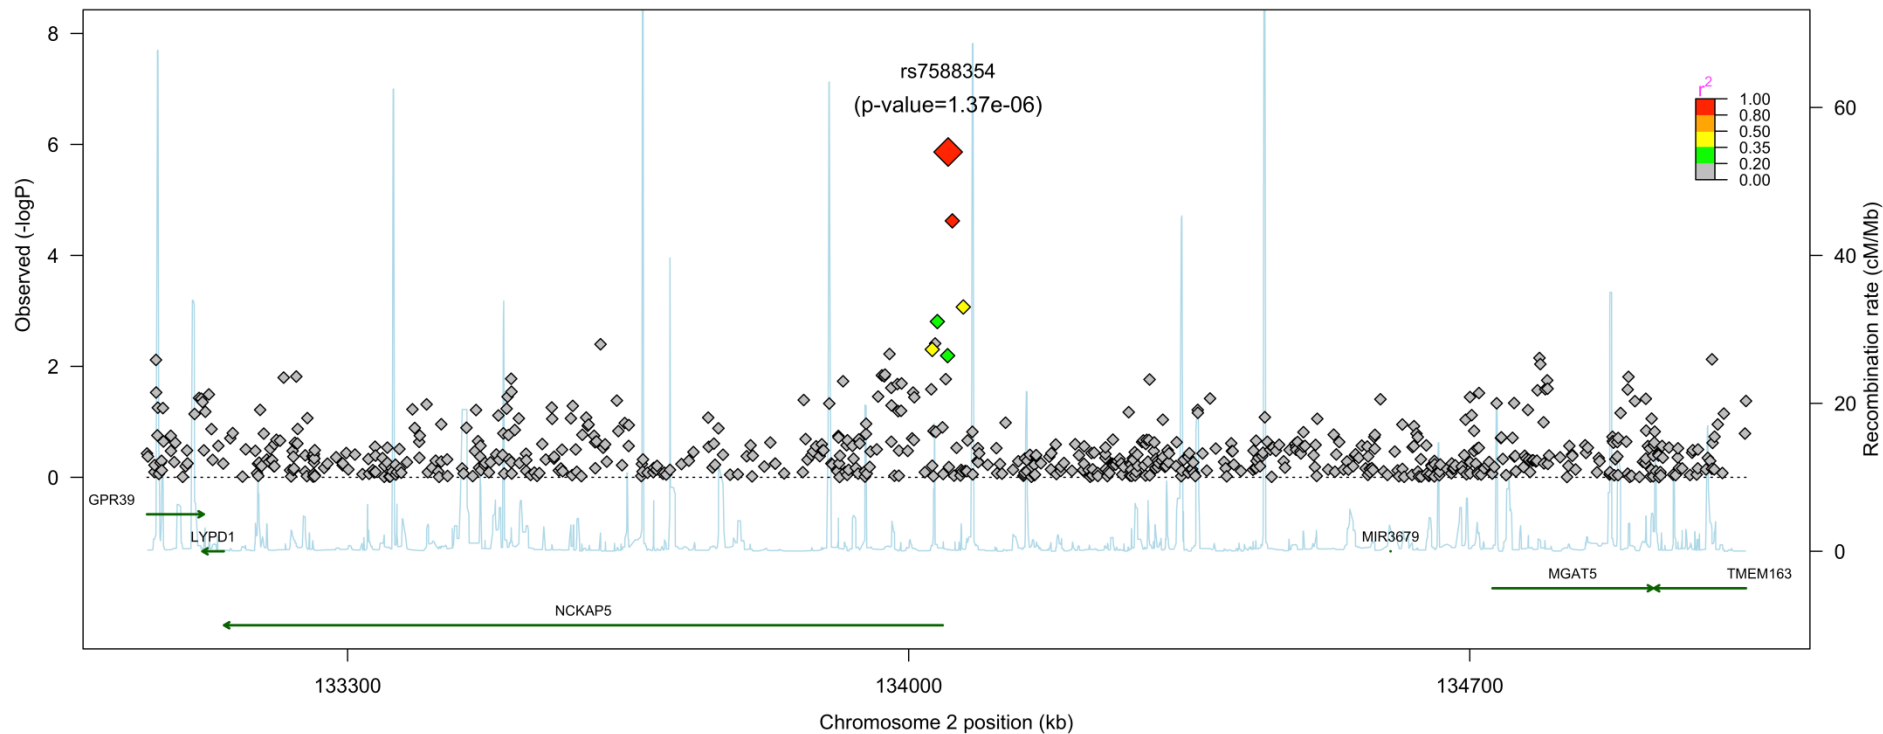

# Supplementary Figure 6: Regional plots for the *CCDC85C*(rs2400749) gene

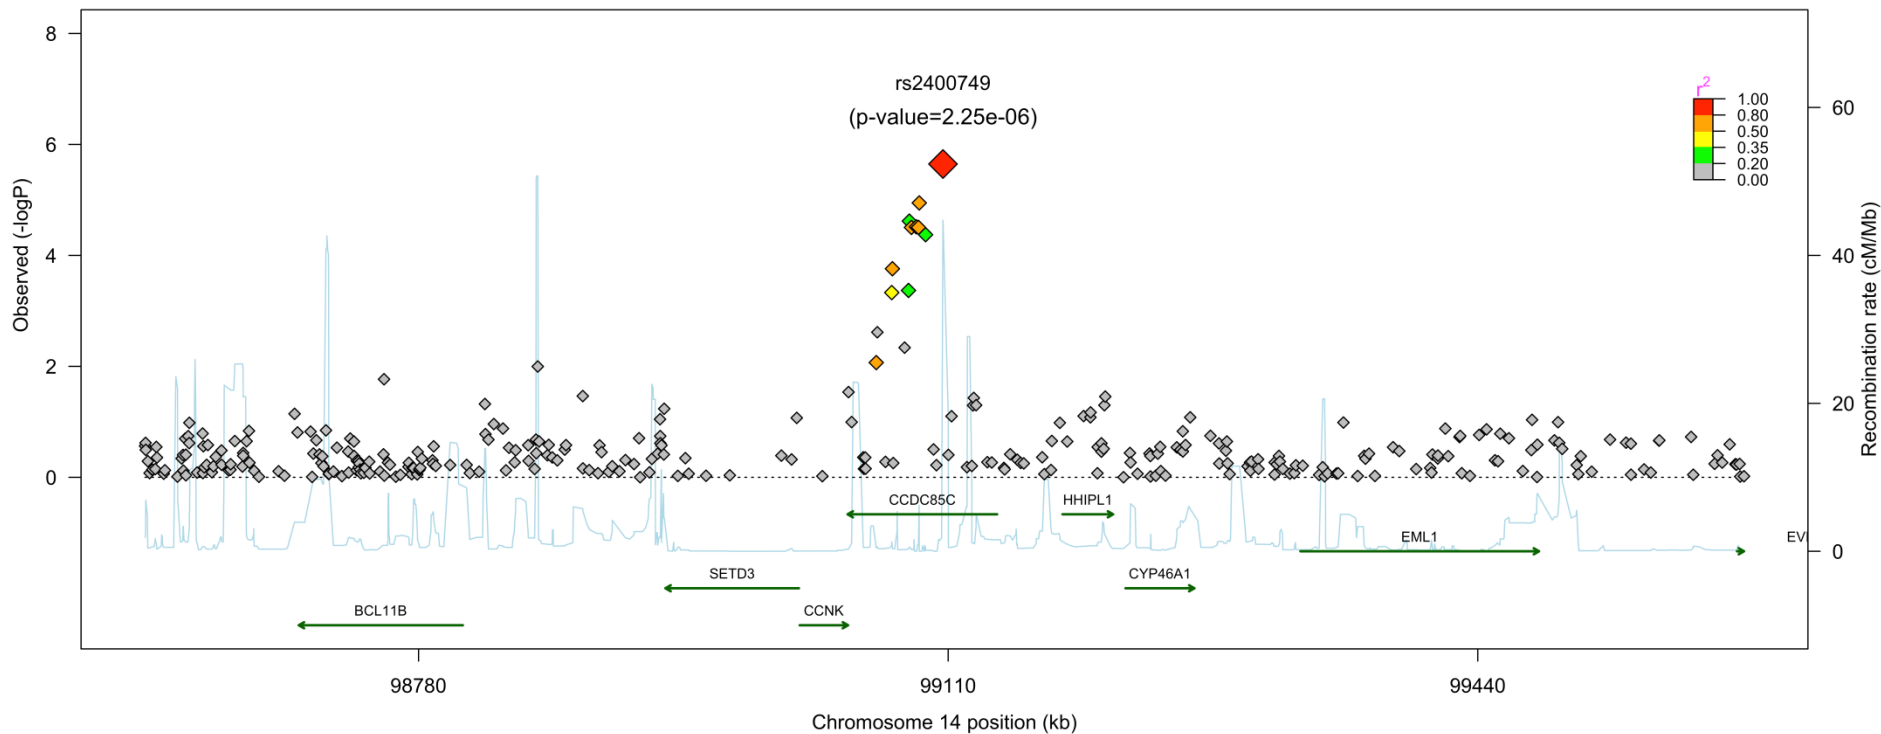

# Supplementary Figure 7: Regional plot for *SDR9C7* (rs840163)

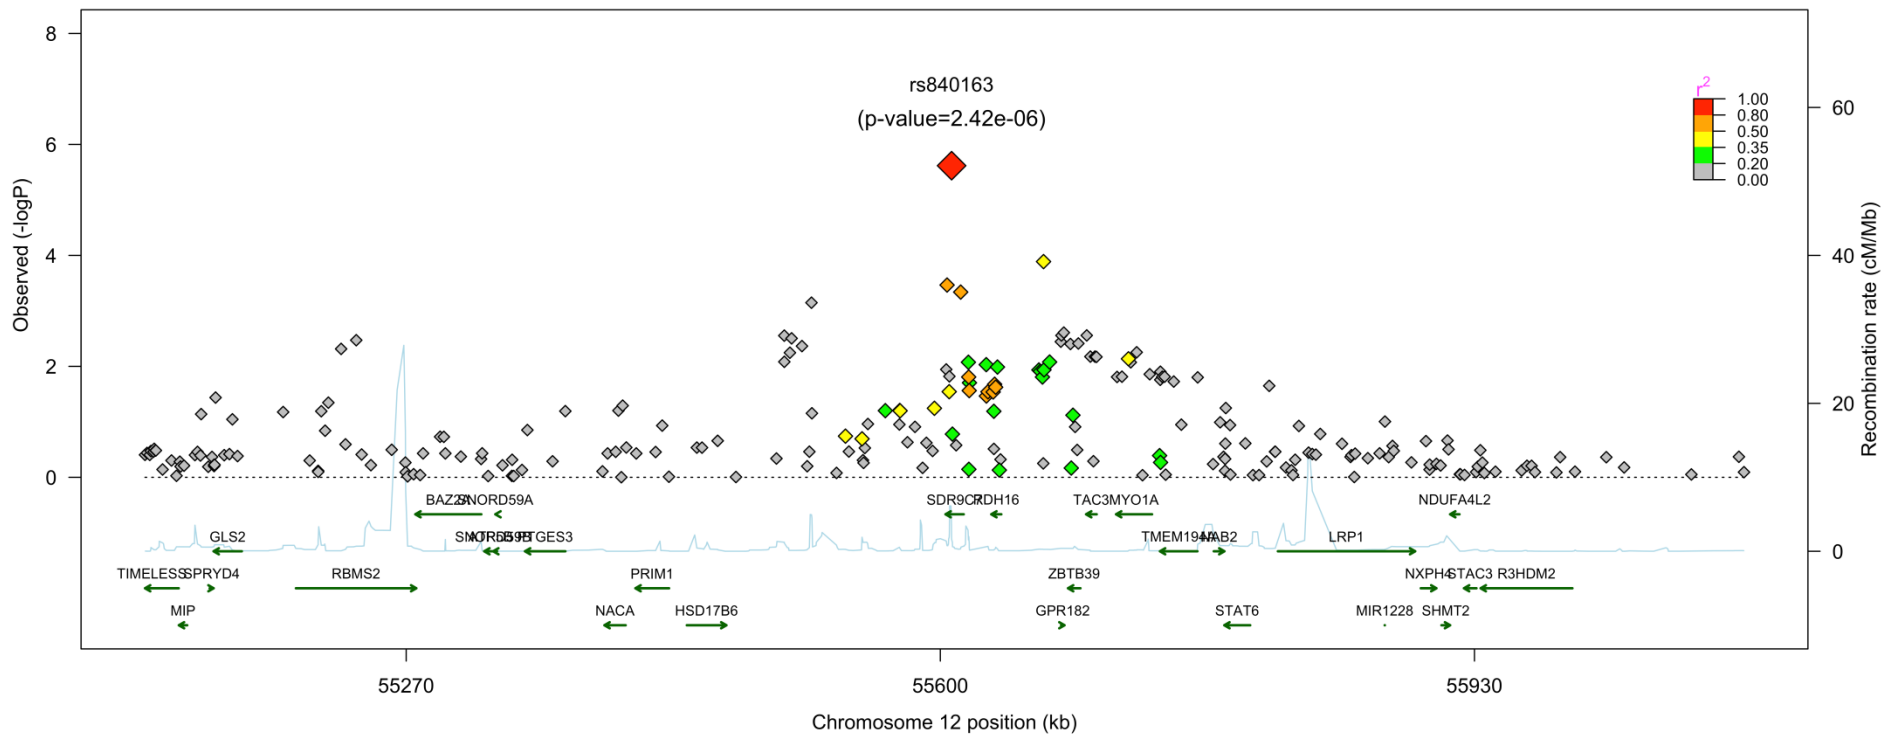

# Supplementary Figure 8: Regional plot for *ALDH4A1* (rs6695033)

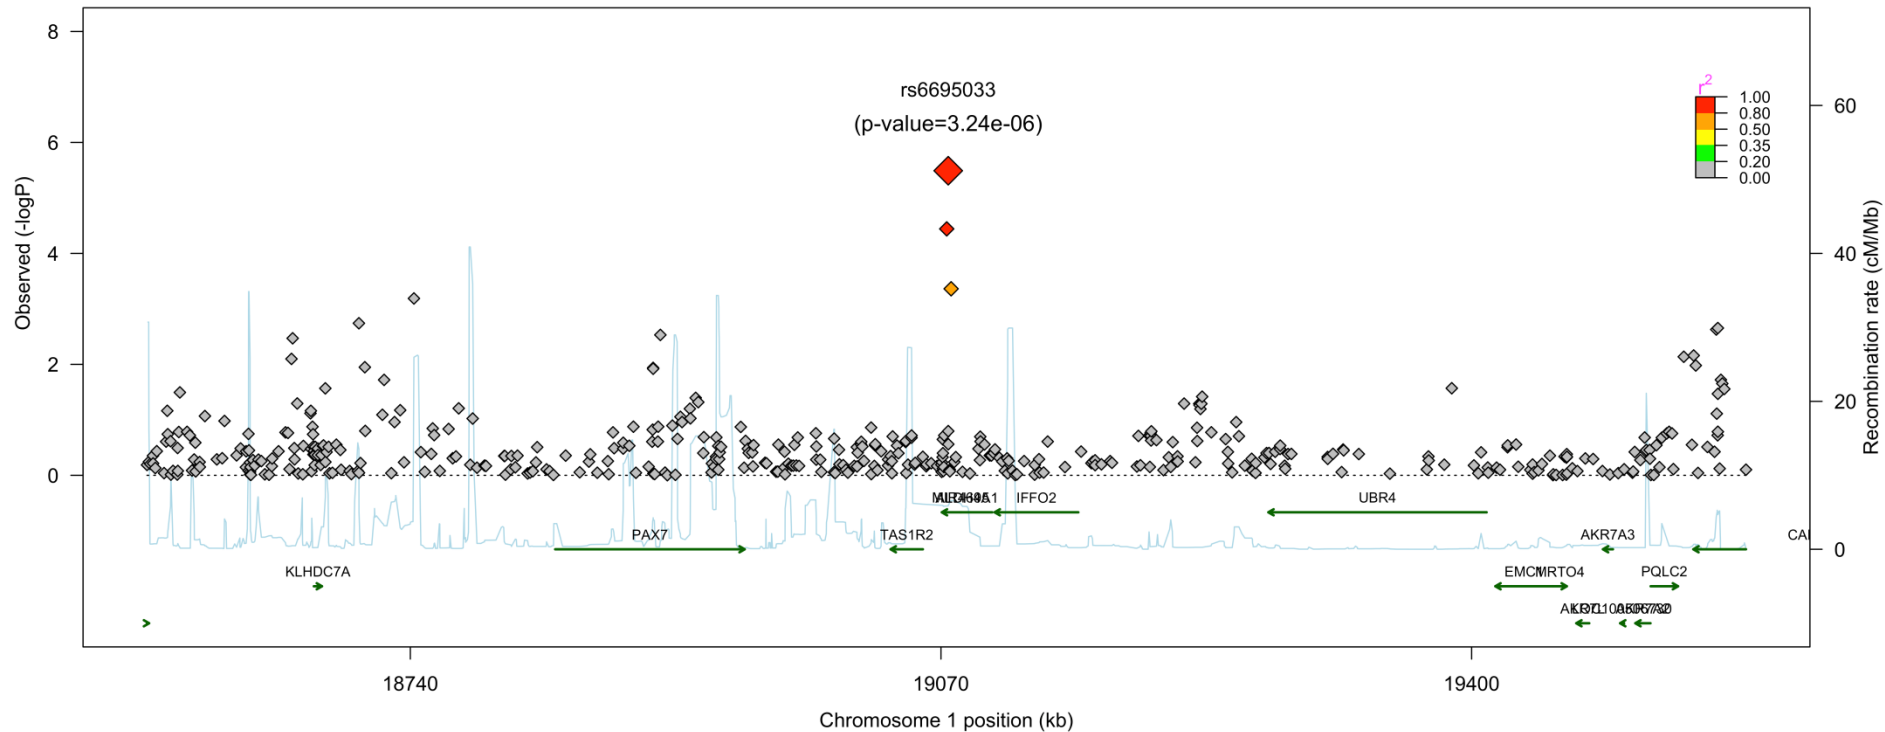



# Supplementary Figure 9: Regional plot for *NARS2* (rs4474465)

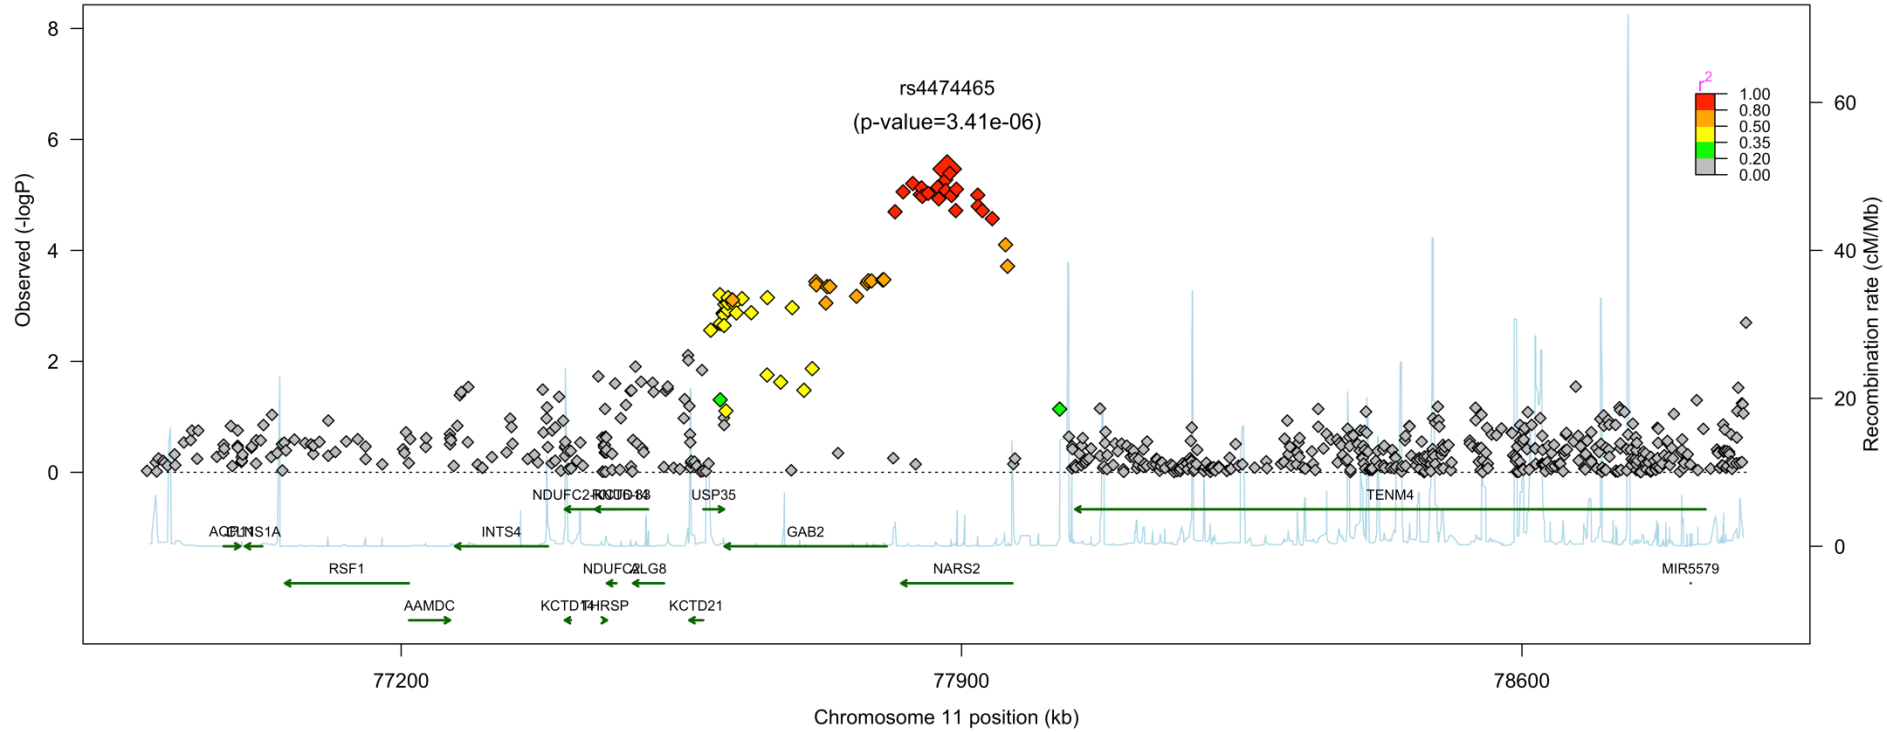

# Supplementary Figure 10: Regional plot for *PKNOX2* (rs11601321)

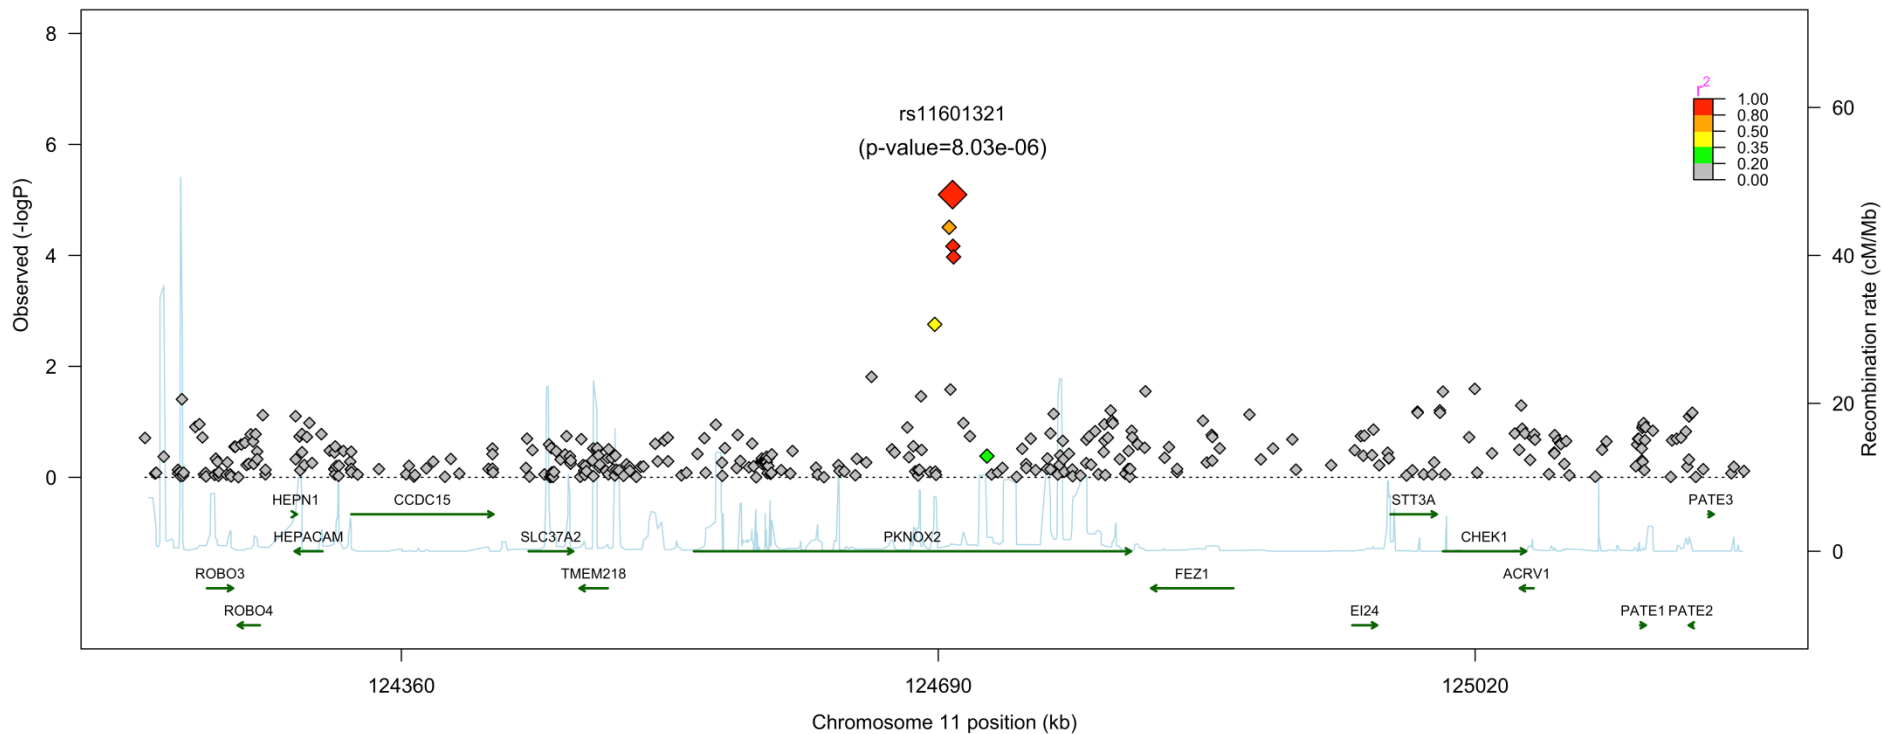

# Supplementary Figure 11: Manhattan plot of Genome-Wide Gene-based Analysis

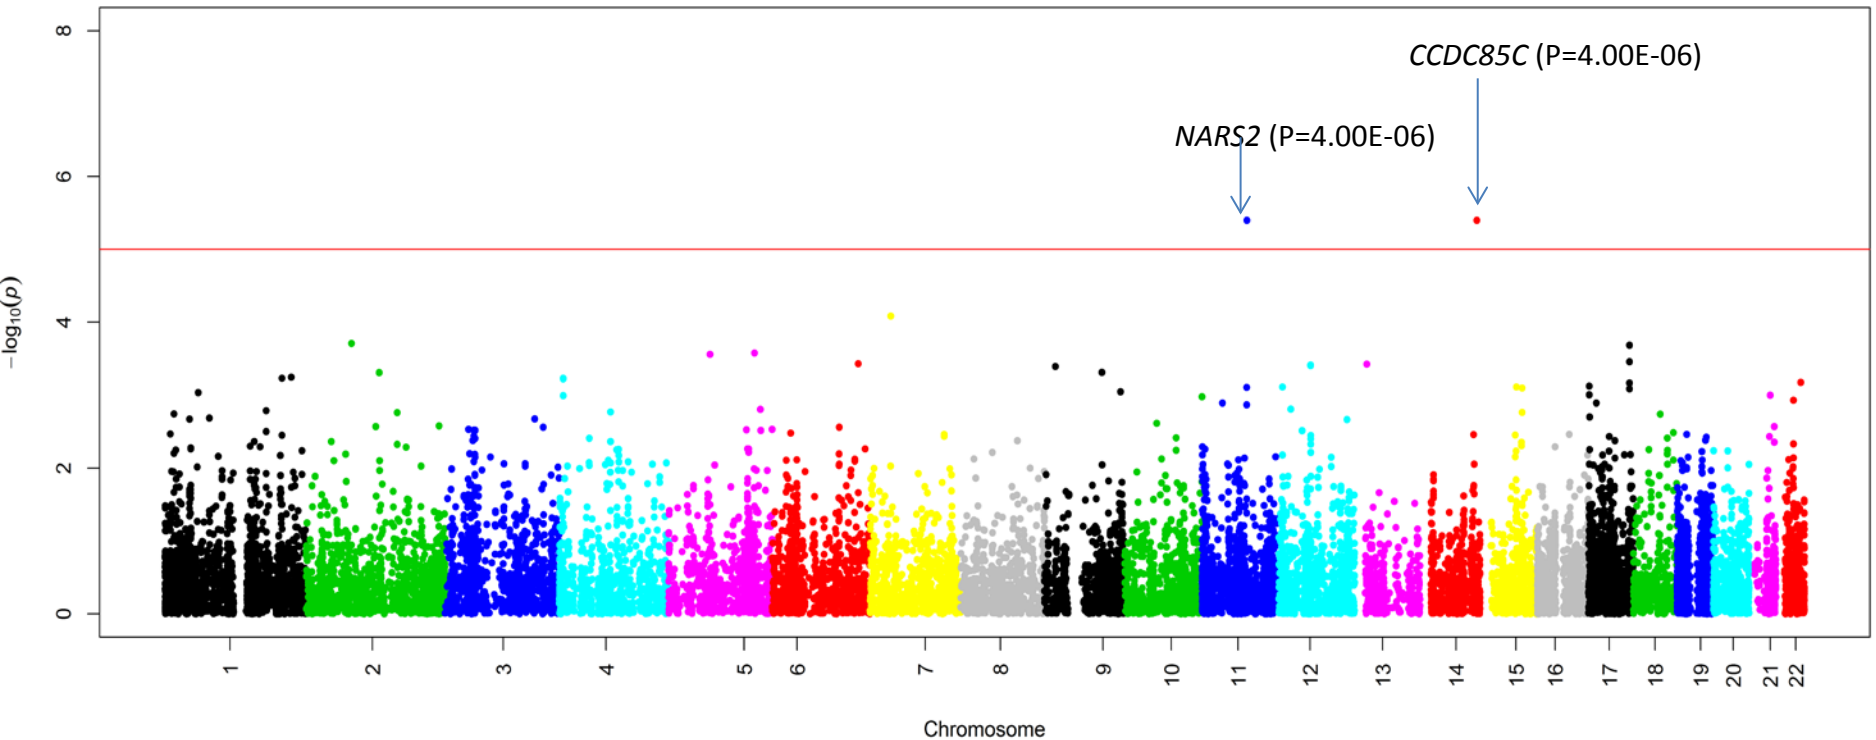

Note: The red line corresponds to the suggestive P-value threshold ( $P < 1.00E-05$ ).
